# Supplementary material for: Performance evaluation of MOMA (MOment MAtching) – a remote network calibration technique for PM 2.5 and PM 10 sensors
Source: Copernicus journal article supplement (doi:10.5194/amt-16-4709-2023), 2023-10-18
Supplement: Supplementary file 1 [file amt-16-4709-2023-supplement.pdf]

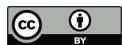

*Supplement of*

## **Performance evaluation of MOMA (MOment MAtching) – a remote network calibration technique for PM<sub>2.5</sub> and PM<sub>10</sub> sensors**

**Lena Francesca Weissert et al.**

*Correspondence to:* Lena Francesca Weissert ([lena.weissert@aeroqual.com](mailto:lena.weissert@aeroqual.com))

The copyright of individual parts of the supplement might differ from the article licence.

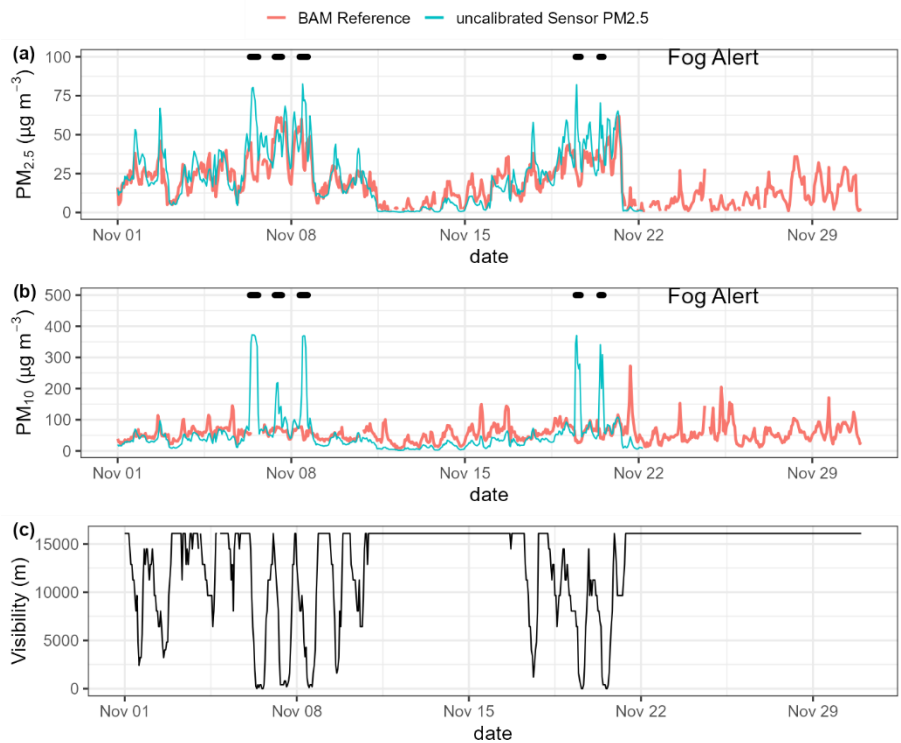

**Figure S1: Timeseries for November 2021 – showing the uncalibrated and BAM reference PM<sub>2.5</sub> (a) and PM<sub>10</sub> (b) as well as the visibility measured by the NOAA weather station located at Riverside Airport (c) to illustrate the impact of fog.**

5

10

15

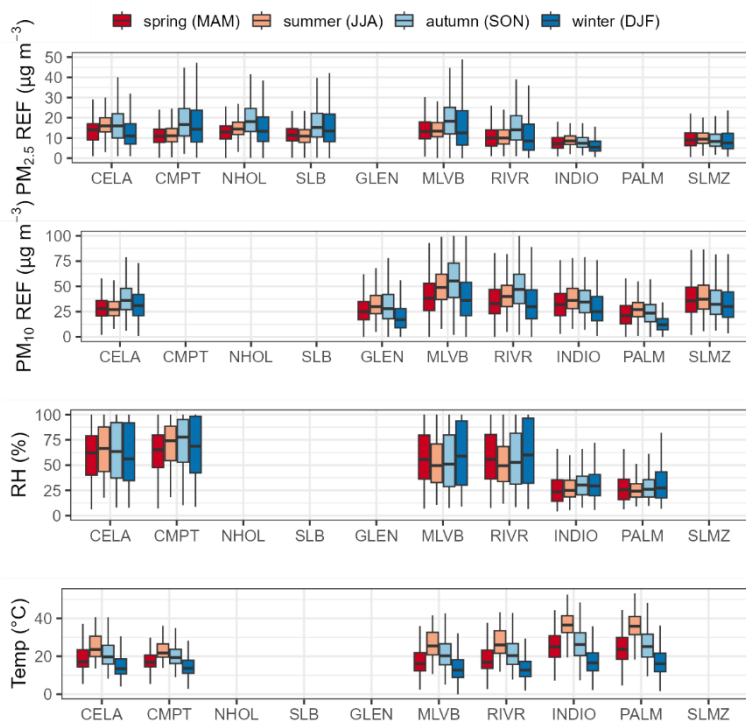

20 **Figure S2: Boxplots showing the seasonal PM<sub>2.5</sub> and PM<sub>10</sub> reference variations in 2021 and the sensor RH and Temperature observed at the co-location sites. The boxplots are coloured by season (spring (MAM): March, April, May, summer (JJA): June, July, August, autumn (SON): September, October, November, winter (DJF): December, January, February).**

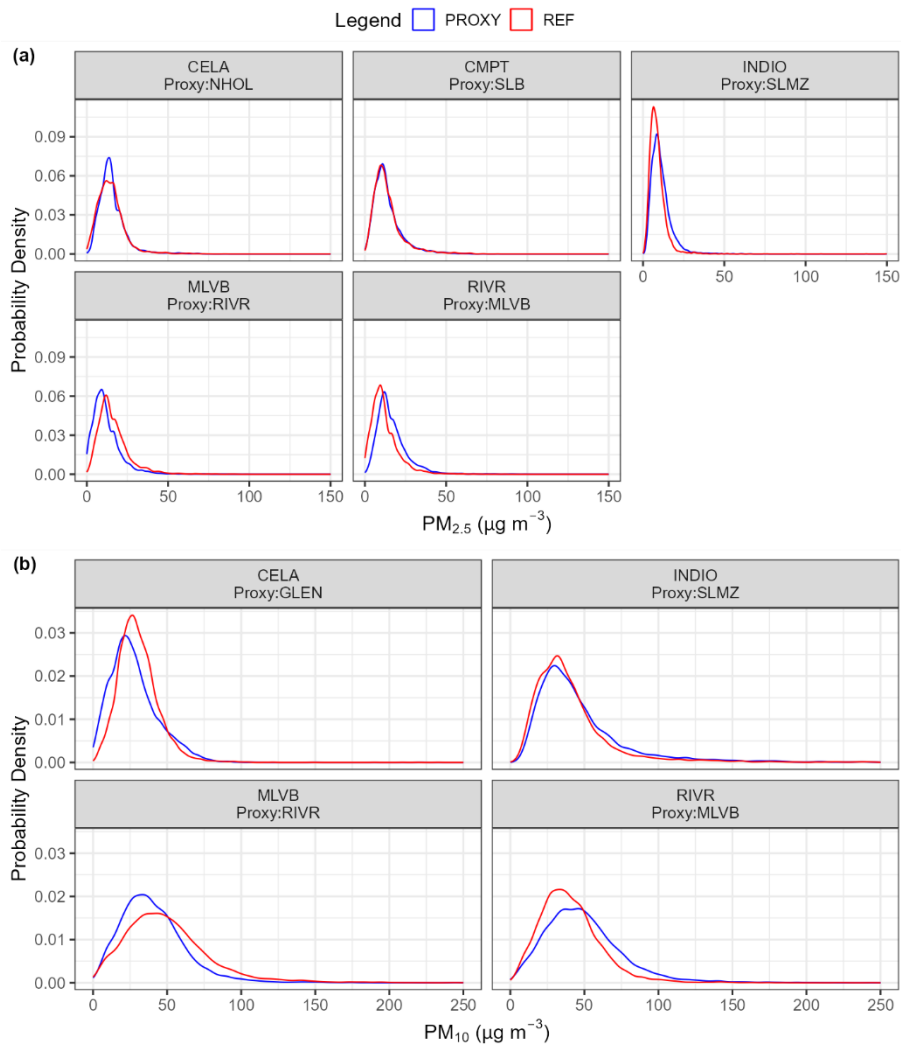

25

**Figure S3: Probability distributions for the Reference  $PM_{2.5}$  (a) and  $PM_{10}$  (b) versus the nearest Proxy  $PM_{2.5}$  and  $PM_{10}$ , respectively.**

30

35

**Table S1. AMS information based on South Coast AQMD Monitoring Network Plan**

<http://www.aqmd.gov/home/air-quality/clean-air-plans/monitoring-network-plan>.

| AMS                | PM <sub>2.5</sub> |              | PM <sub>10</sub> |              |
|--------------------|-------------------|--------------|------------------|--------------|
|                    | Continuous        | FRM Schedule | Continuous       | FRM Schedule |
| RIVR               | BAM1020           | Daily        | BAM1020          | 1:3 days     |
| MLVB               | BAM1020           | Daily        | BAM1020          | 1:6 days     |
| SNBO               | -                 | 1:3 days     | BAM1020          | -            |
| CRES               | BAM1020           | -            | -                | 1:6 days     |
| PALM               | -                 | 1:3 days     | Thermo 5014i     | -            |
| INDIO              | BAM1020           | 1:12 days    | Thermo 5014i     | 1:6 days     |
| GLEN               | BAM1020           | -            | BAM1020          | -            |
| ANA                | BAM1020           | Daily        | BAM1020          | -            |
| CELA               | BAM1020           | Daily        | BAM1020          | 1:6 days     |
| CMPT               | BAM1020           | Daily        | -                | -            |
| NHOL               | BAM1020           | -            | -                | -            |
| SLMZ <sup>1)</sup> | T640              | -            | T640             | -            |

<sup>1)</sup> The T640 at Saul Martinez (SLMZ) is run by a special monitoring project and is not part of the Ambient Monitoring Network.

**Table S2. Parameter code used to do retrieve the speciation data from the RAQSAPI package and the parameter it refers to as well as the group it has been assigned to.**

| <b>Code</b> | <b>Value represented</b> | <b>Category</b>  | <b>Collection Description</b>                     |
|-------------|--------------------------|------------------|---------------------------------------------------|
| 88104       | Aluminum PM2.5 LC        | Crustal Material | Met One SASS/SuperSASS Teflon                     |
| 88111       | Calcium PM2.5 LC         | Crustal Material | Met One SASS/SuperSASS Teflon                     |
| 88126       | Iron PM2.5 LC            | Crustal Material | Met One SASS/SuperSASS Teflon                     |
| 88140       | Magnesium                | Crustal Material | Met One SASS/SuperSASS Teflon                     |
| 88165       | Silicon PM2.5 LC         | Crustal Material | Met One SASS/SuperSASS Teflon                     |
| 88180       | Potassium                | Crustal Material | Met One SASS/SuperSASS Teflon                     |
| 88184       | Sodium PM2.5 LC          | Trace Ions       | Met One SASS/SuperSASS Teflon                     |
| 88203       | Chloride                 | Trace Ions       | Met One SASS/SuperSASS Teflon                     |
| 88301       | Ammonium                 | Secondary Ions   | Met One SASS/SuperSASS Teflon                     |
| 88303       | Potassium Ion            | Trace Ions       | Met One SASS/SuperSASS Teflon                     |
| 88306       | Total Nitrate            | Secondary Ions   | Met One SASS/SuperSASS Teflon                     |
| 88381       | EC PM2.5 LC TOT          | Elemental Carbon | URG 3000 N w/Pall Quartz filter and Cyclone Inlet |
| 88382       | OC PM2.5 LC TOT          | Organic Carbon   | URG 3000 N w/Pall Quartz filter and Cyclone Inlet |
| 88403       | Sulfate PM2.5 LC         | Secondary Ions   | Met One SASS/SuperSASS Teflon                     |
